# Supplementary material
Source: PubMed Central journal article supplement (PMC10569796)
Supplement: JMI_010_054502_SD001.pdf [file JMI_010_054502_SD001.pdf]

Supplement:

*Preprocessing*

As a pre-processing step, echocardiogram videos that are clinically stored in the Dicom format were first processed automatically by extracting frames in the video. Once all the frames of various aspect ratios and image sizes were extracted, the frames were then converted to grayscale images and center cropped by removing the top and bottom 10% and the left and right 25% of the image. Once the images were cropped, they were matched to the average histogram of the training dataset and resized to the input of the model.

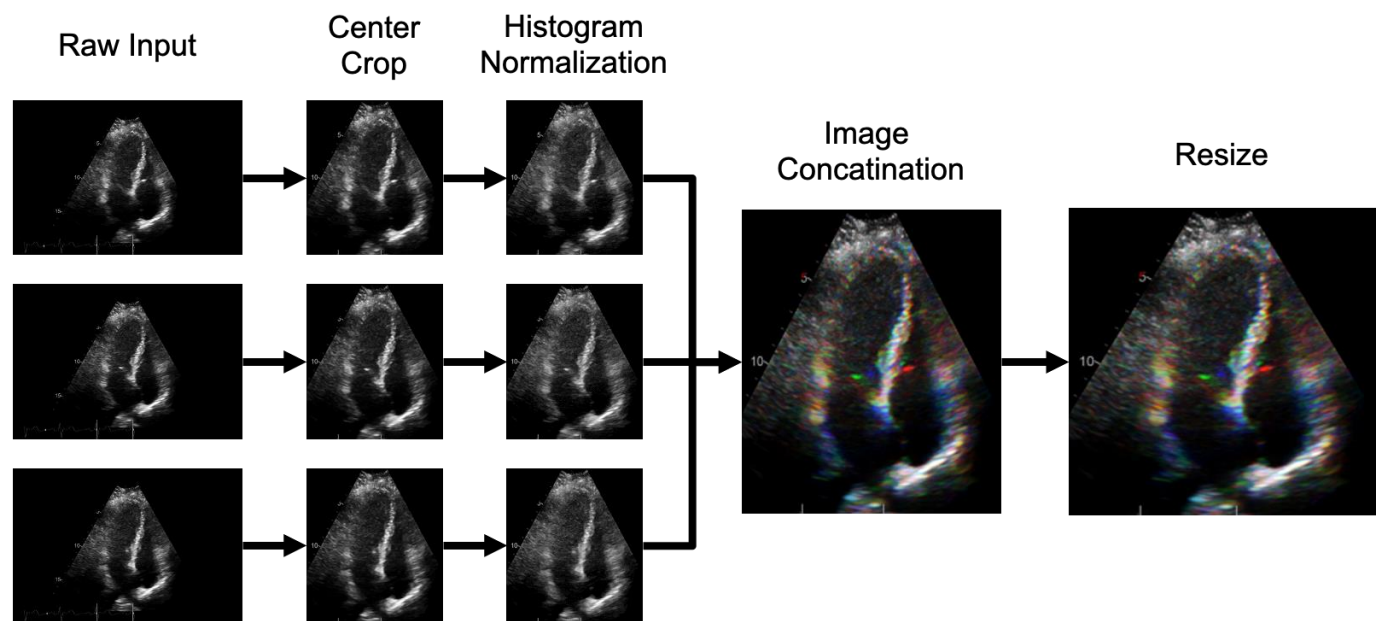

Figure Supp.1 . Preprocessing echocardiogram frames. Each image shows the output of the processing, and text above shows the process names. The red bars were used to anonymize the patient information for the figure.

## Results: AUCROC and Confusion Matrix

### ResNet50 figures

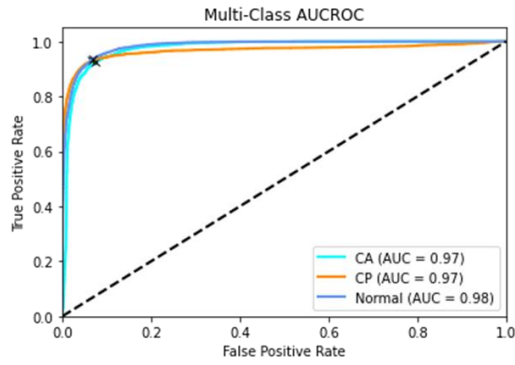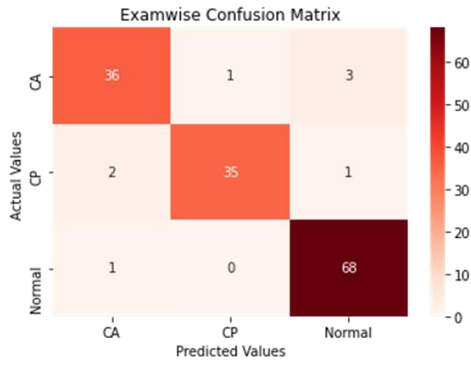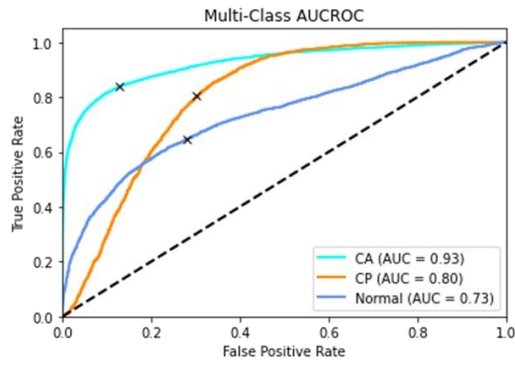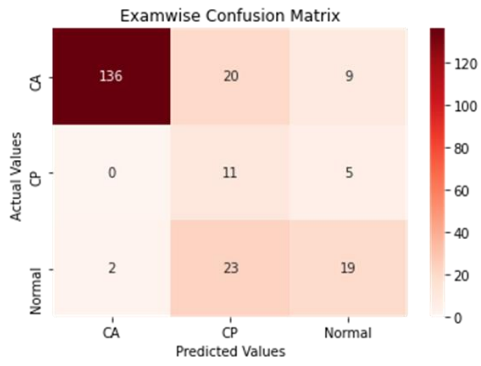

### ResNeXt101 Results

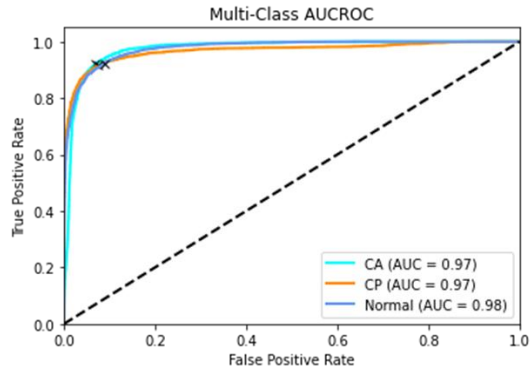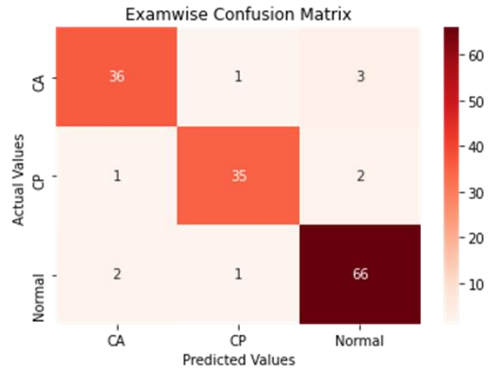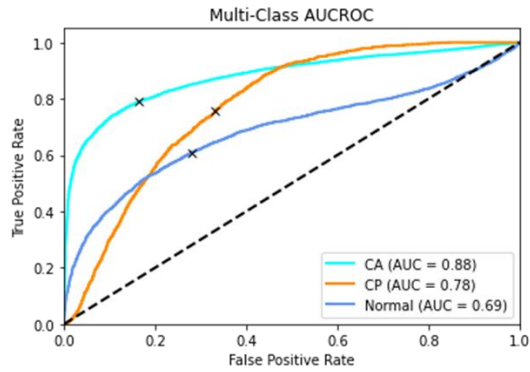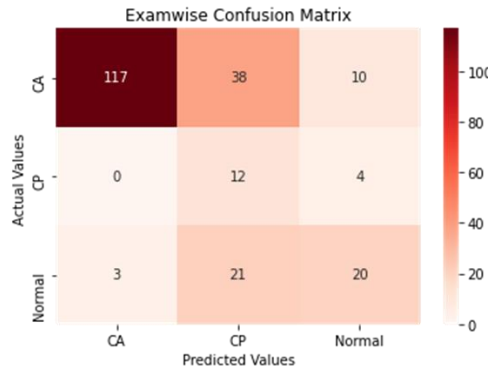

## EfficientNet-b2 Results

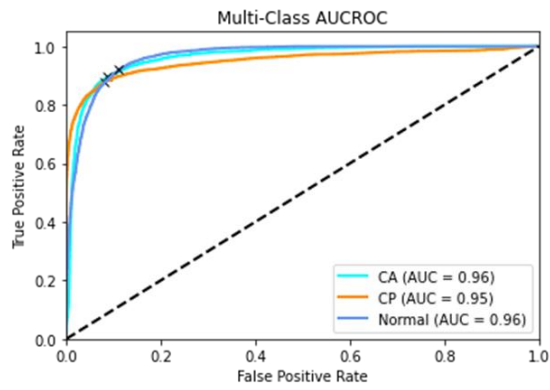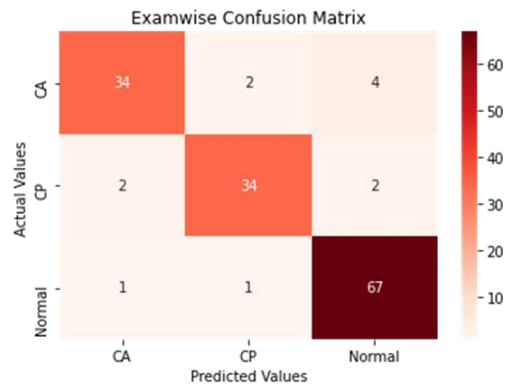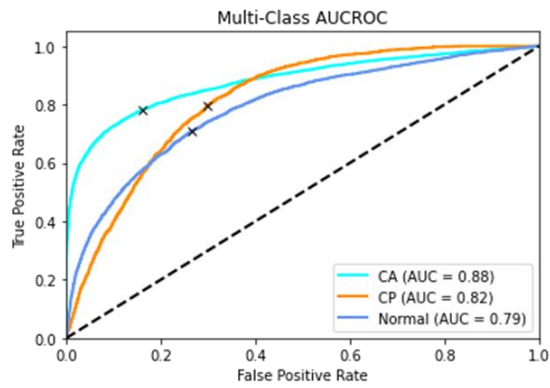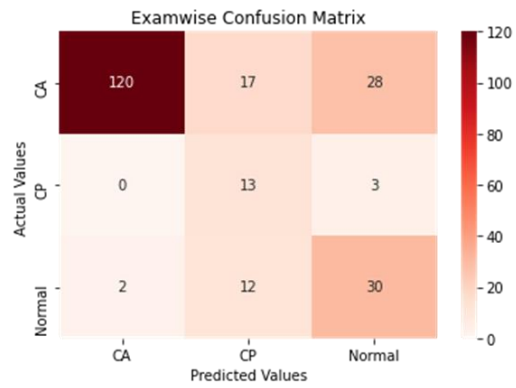

Figure Supp.2 . Comparative model performance on the internal (top) and external (bottom) dataset – AUROC and confusion matrix.

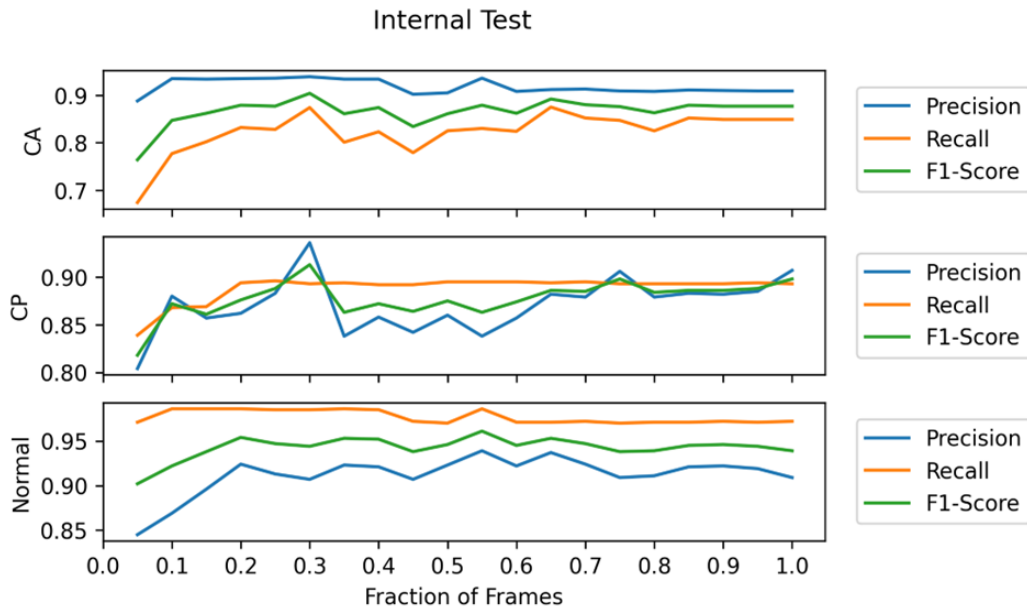

Figure Supp.3 . Frame-wise ablation – x-axis shows the fraction of frames and y axis shows the performance metrics.

Supplemental Table 1:

|                                                                                     |                                                                                     |                                                                                      |                                                                                       |           |               |
|-------------------------------------------------------------------------------------|-------------------------------------------------------------------------------------|--------------------------------------------------------------------------------------|---------------------------------------------------------------------------------------|-----------|---------------|
| 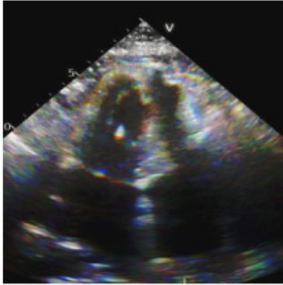 |  |  |  |           |               |
| (a)                                                                                 |                                                                                     | (b)                                                                                  |                                                                                       |           |               |
| CA: 0.044                                                                           | CP: 0.859                                                                           | Normal: 0.097                                                                        | CA: 0.546                                                                             | CP: 0.309 | Normal: 0.145 |
|  |  |  |  |           |               |
| (c)                                                                                 |                                                                                     | (d)                                                                                  |                                                                                       |           |               |
| CA: 0.062                                                                           | CP: 0.435                                                                           | Normal: 0.503                                                                        | CA: 0.271                                                                             | CP: 0.168 | Normal: 0.561 |

Supplemental Table 2: Gray-zone prediction probabilities of the figures in Figure 5.

| <b>Image</b> | <b>CA</b> | <b>CP</b> | <b>Normal</b> |
|--------------|-----------|-----------|---------------|
| (a)          | 0.044     | 0.859     | 0.097         |
| (b)          | 0.546     | 0.309     | 0.145         |
| (c)          | 0.062     | 0.435     | 0.503         |
| (d)          | 0.271     | 0.168     | 0.561         |
